# Supplementary material for: Comparison of BTSE-RGD with DOTA-RGD as a potential imaging agent for tumors
Source: Royal Society of Chemistry journal article supplement (doi:10.1039/c5ra06437f), 2015-01-01

**Supplementary Data**

Table-1

| <b>Radiochemical Synthesis</b> | <b>Yield</b> | <b>Specific activity</b> |
|--------------------------------|--------------|--------------------------|
| <b>1</b>                       | 96.50        | 36 MBq/ $\mu$ mol        |
| <b>2</b>                       | 97.05        | 48 MBq/ $\mu$ mol        |
| <b>3</b>                       | 96.58        | 89 MBq/ $\mu$ mol        |
| <b>4</b>                       | 96.74        | 75 MBq/ $\mu$ mol        |
| <b>5</b>                       | 97.12        | 82 MBq/ $\mu$ mol        |

Table-2

Blood clearance of  $^{99m}\text{Tc}$ -DOTA- RGD administrated through ear vein in normal mice

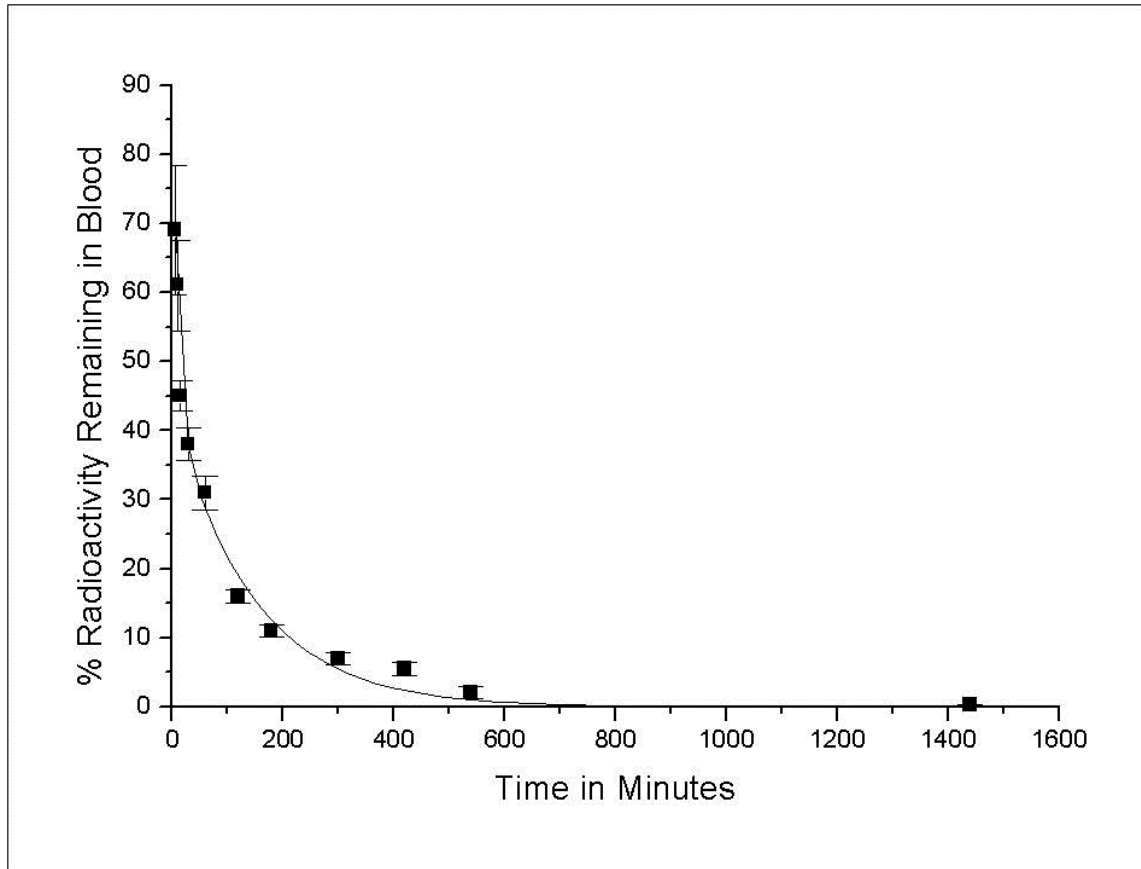

Supplement: c5ra06437f1.pdf [file c5ra06437f1.pdf]
